# Supplementary material for: Silver nanoparticle-immobilized porous POM/PLLA nanofibrous membranes: efficient catalysts for reduction of 4-nitroaniline
Source: Royal Society of Chemistry journal article supplement (doi:10.1039/c6ra28167b), 2017-01-01
Supplement: c6ra28167b2.pdf [file c6ra28167b2.pdf]

## ESI

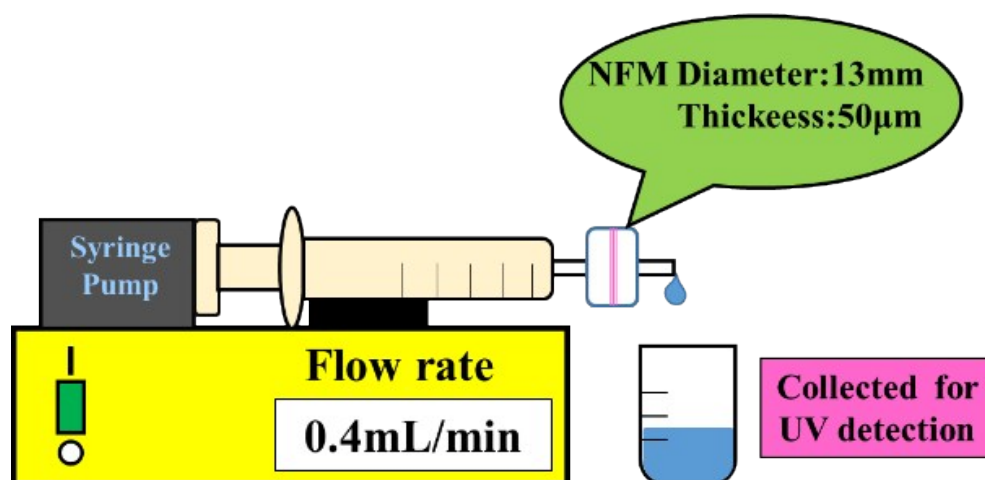

Figure S1 Experimental set-up for the investigation of continuous catalytic hydrogenation of 4-NA using POM/PLLA-Ag NFMs

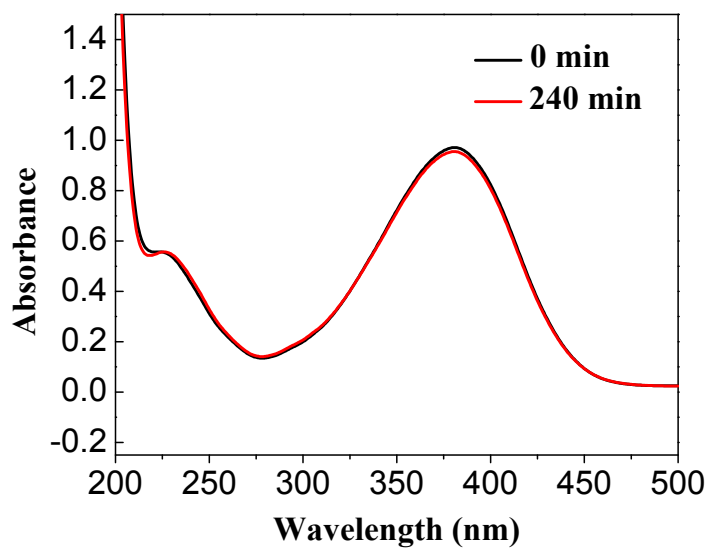

Figure S2. UV-visible spectra for the successive chemical reduction of 4-NA with NaBH<sub>4</sub> without POM/PLLA-Ag NFMs (Figure S2)
